# Supplementary material for: Increased interregional virus exchange and nucleotide diversity outline the expansion of chikungunya virus in Brazil
Source: PubMed Central journal article supplement (PMC10362057; doi:10.1038/s41467-023-40099-y), 2023-07-21
Supplement: 41467_2023_40099_MOESM3_ESM.pdf [file 41467_2023_40099_MOESM3_ESM.pdf]

## **Description of Additional Supplementary Files**

File Name: Supplementary Data 1

Description: Sample information, sequencing statistics and PCR primers sequences.

File Name: Supplementary Data 2

Description: Maximum Likelihood tree file reconstructed using the global dataset.
